# Supplementary material for: In Vitro Effects of Low-Intensity Pulsed Ultrasound Stimulation on the Osteogenic Differentiation of Human Alveolar Bone-Derived Mesenchymal Stem Cells for Tooth Tissue Engineering
Source: PubMed Central journal article supplement (PMC3806253; doi:10.1155/2013/269724), 2013-09-30

## Supporting Information, S1

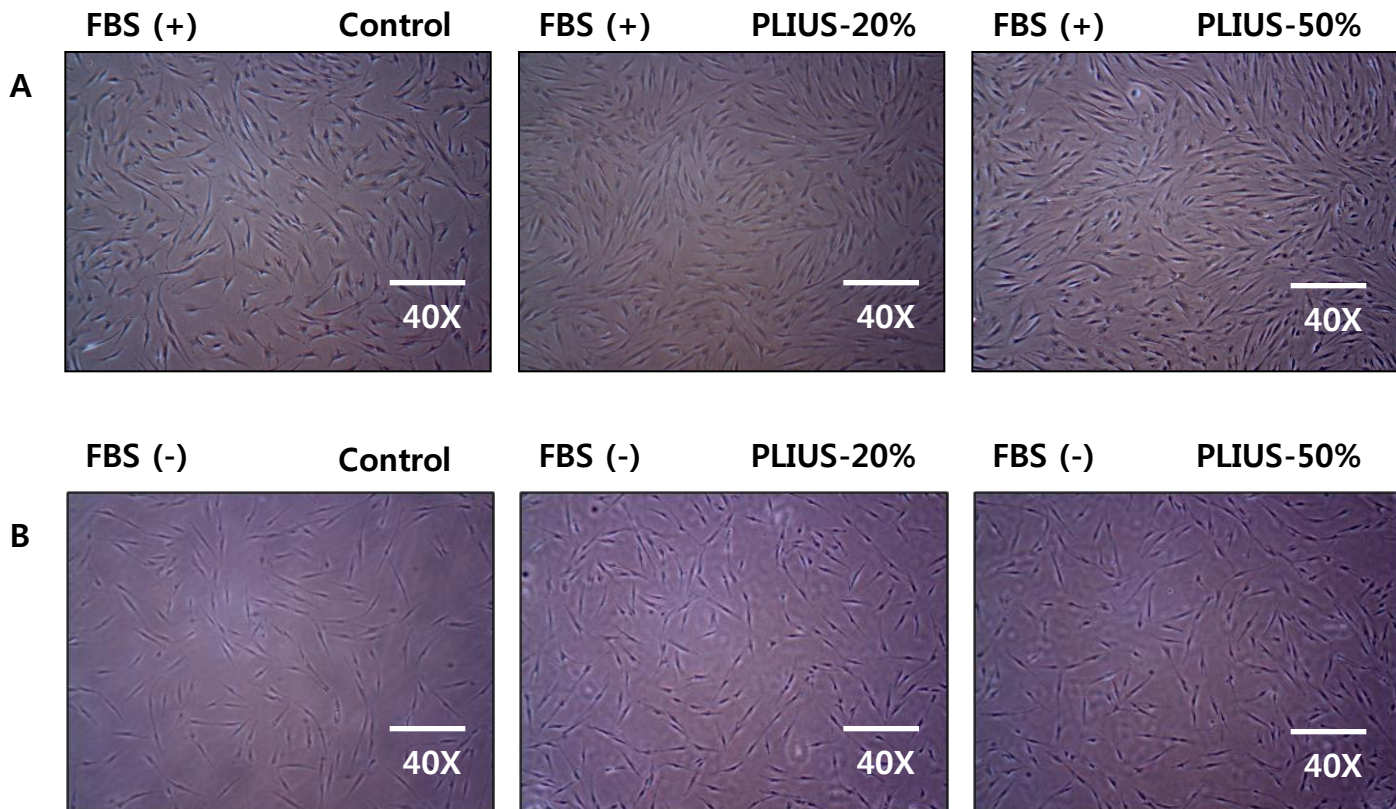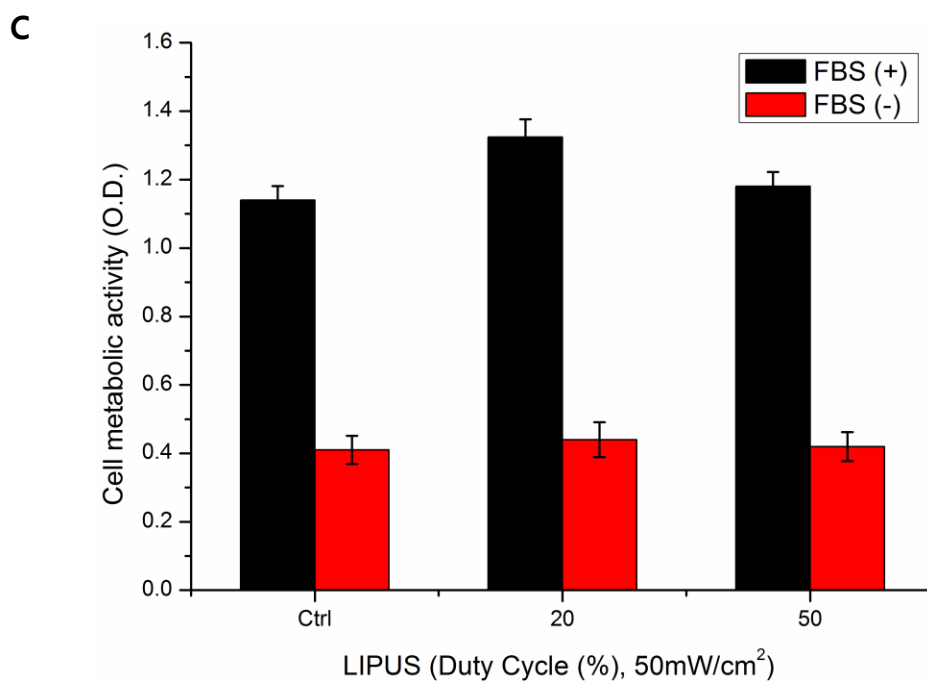

# Supporting Information, S2

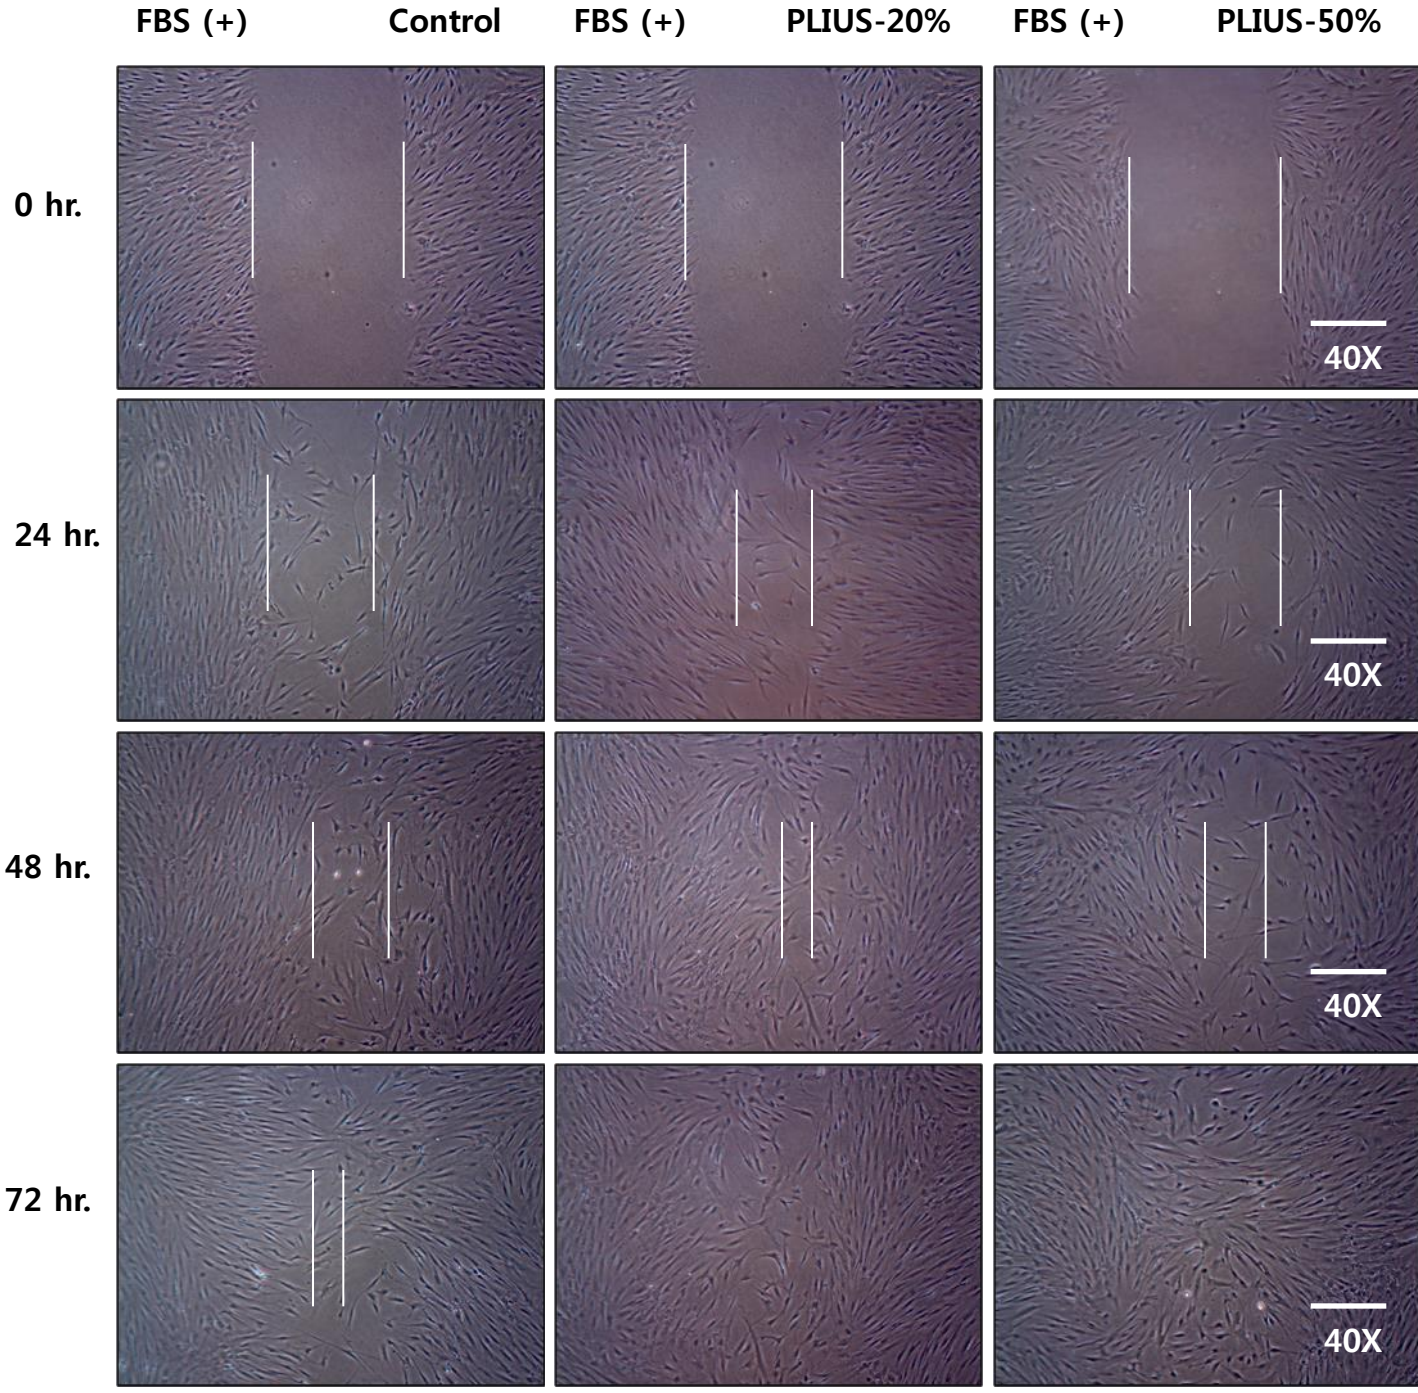



# Supporting Information, S3

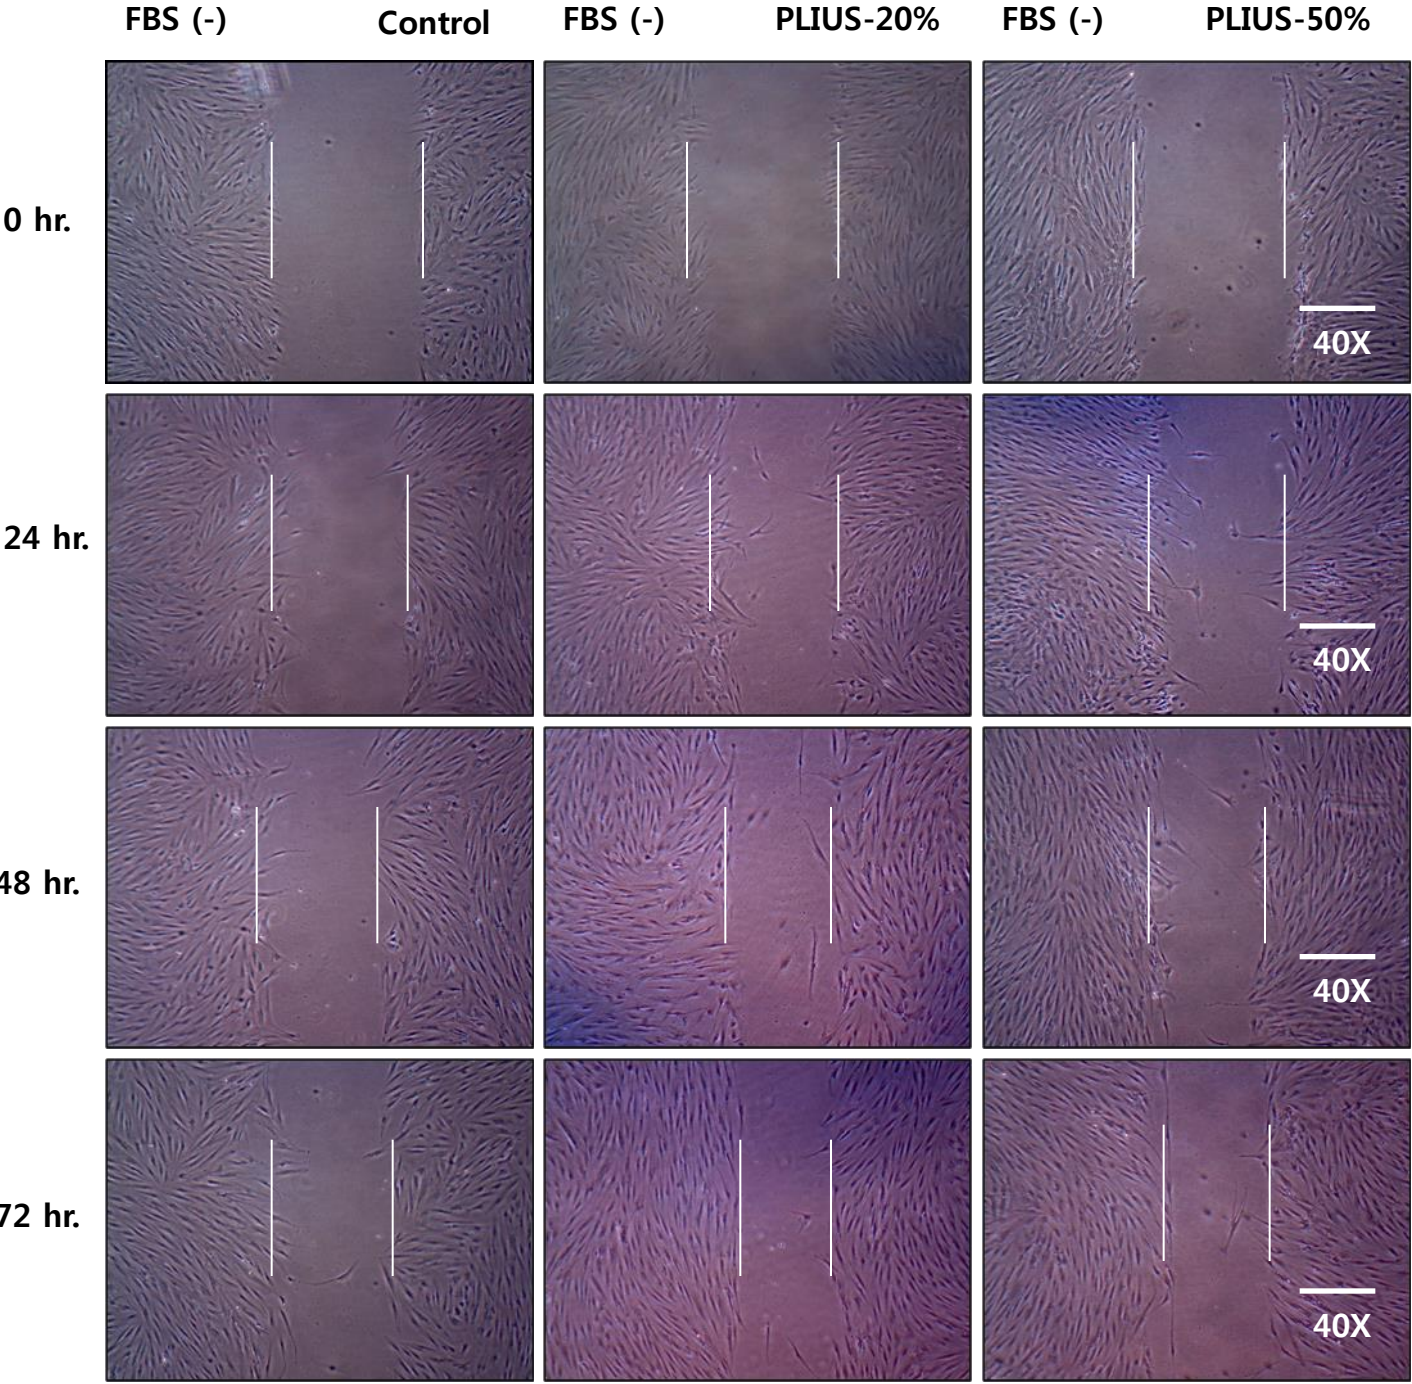

Supplement: 269724.f1.pdf [file 269724.f1.pdf]
